# Supplementary material for: Using applied pressure to guide materials design: a neutron diffraction study of La2NiO4+δand Pr2NiO4+δ
Source: Royal Society of Chemistry journal article supplement (doi:10.1039/d0dt02155e), 2020-01-01
Supplement: d0dt02155e1.pdf [file d0dt02155e1.pdf]

# Using Applied Pressure to Guide Materials Design: A Neutron Diffraction Study of $\text{La}_2\text{NiO}_{4+\delta}$ and $\text{Pr}_2\text{NiO}_{4+\delta}$

## SUPPLEMENTARY INFORMATION

Craig L Bull,<sup>a,\*</sup> Christopher J Ridley,<sup>a</sup> Helen Y Playford,<sup>a</sup>

<sup>a</sup> ISIS Facility, Rutherford Appleton Laboratory, Harwell Science and Innovation Campus,  
Didcot, OX11 0QX, UK

\*To whom correspondence should be addressed;

E-mail: CRAIG.BULL@STFC.ac.uk

Submitted to Dalton Transactions

The table below shows the determined structural parameters from the refinement of  $\text{La}_2\text{NiO}_4$  and  $\text{Pr}_2\text{NiO}_4$ . It contains the refined parameters from the Rietveld analysis: Lattice parameters ( $a$ ,  $b$  &  $c$ ), unit cell volume and the lanthanide and oxygen (2)  $z$  atom positions. The remaining structural parameters are fixed as defined in the main text. The quality of fit indicators are also given for the whole pattern including anvils and lead. High background from anvils results in the low  $\chi^2$  values in the  $\text{Pr}_2\text{NiO}_4$  experiment as a result of an anvil with high preferred orientation.

| La <sub>2</sub> NiO <sub>4</sub>   |               |               |               |               |               |               |               |               |              |
|------------------------------------|---------------|---------------|---------------|---------------|---------------|---------------|---------------|---------------|--------------|
| Pressure (GPa)                     | 0.024         | 0.182         | 0.437         | 0.75          | 1.192         | 1.663         | 2.296         | 2.822         |              |
| Symmetry                           | Tetragonal    |              |
| Space Group                        | <i>I4/mmm</i> |              |
| a (Å)                              | 3.86209(13)   | 3.86151(15)   | 3.85900(17)   | 3.85669(17)   | 3.85314(17)   | 3.84935(17)   | 3.84486(18)   | 3.84010(21)   |              |
| b (Å)                              | 3.86209(13)   | 3.86151(15)   | 3.85900(17)   | 3.85669(17)   | 3.85314(17)   | 3.84935(17)   | 3.84486(18)   | 3.84010(21)   |              |
| c (Å)                              | 12.6908(8)    | 12.6852(10)   | 12.6774(11)   | 12.6661(11)   | 12.6542(11)   | 12.6367(11)   | 12.6217(12)   | 12.6059(14)   |              |
| Unit cell volume (Å <sup>3</sup> ) | 189.294(15)   | 189.153(17)   | 188.790(19)   | 188.396(19)   | 187.874(19)   | 187.244(19)   | 186.586(20)   | 185.892(23)   |              |
| La z                               | 0.3614(4)     | 0.3624(5)     | 0.3619(5)     | 0.3625(5)     | 0.3619(5)     | 0.3606(5)     | 0.3612(5)     | 0.3611(6)     |              |
| O2 z                               | 0.1681(2)     | 0.1669(6)     | 0.1688(8)     | 0.1696(8)     | 0.1688(5)     | 0.1733(10)    | 0.1715(8)     | 0.1720(10)    |              |
| Z                                  | 2             | 2             | 2             | 2             | 2             | 2             | 2             | 2             |              |
| $\chi^2$                           | 2.3           | 1.9           | 2.4           | 2.4           | 1.9           | 1.8           | 1.9           | 1.3           |              |
| wRp                                | 3.8           | 4.7           | 4.8           | 4.9           | 4.3           | 4.2           | 4.5           | 5.3           |              |
| Rp                                 | 4.2           | 5.8           | 6.3           | 6.1           | 4.3           | 4.5           | 4.6           | 5.5           |              |
| Pr <sub>2</sub> NiO <sub>4</sub>   |               |               |               |               |               |               |               |               |              |
| Pressure (GPa)                     | 0             | 0.022         | 0.063         | 0.128         | 0.266         | 0.671         | 1.197         | 1.677         | 2.234        |
| Symmetry                           | Orthorhombic  | Orthorhombic |
| Space Group                        | <i>Fmmm</i>   | <i>Fmmm</i>  |
| a (Å)                              | 5.3952(5)     | 5.3971(4)     | 5.3965(5)     | 5.3970(5)     | 5.3953(6)     | 5.3890(7)     | 5.3853(7)     | 5.3754(7)     | 5.3724(11)   |
| b (Å)                              | 5.4617(5)     | 5.4610(4)     | 5.4627(5)     | 5.4622(5)     | 5.4627(6)     | 5.4604(7)     | 5.4547(7)     | 5.4516(7)     | 5.4455(11)   |
| c (Å)                              | 12.4711(10)   | 12.4648(9)    | 12.4580(10)   | 12.4499(11)   | 12.4426(12)   | 12.4257(14)   | 12.4080(14)   | 12.3937(14)   | 12.3643      |
| Unit cell volume (Å <sup>3</sup> ) | 367.482(34)   | 367.379(30)   | 367.252(34)   | 367.01(4)     | 366.72(4)     | 365.64(5)     | 364.48(5)     | 363.19(5)     | 361.73(9)    |
| La z                               | 0.3574(5)     | 0.3585(4)     | 0.3595(5)     | 0.3590(5)     | 0.3617(7)     | 0.3577(7)     | 0.3584(7)     | 0.3594(7)     | 0.3615(9)    |
| O2 z                               | 0.1714(7)     | 0.1717(5)     | 0.1713(6)     | 0.1703        | 0.1692(6)     | 0.1715(8)     | 0.1703(8)     | 0.1705(7)     | 0.1728(9)    |
| Z                                  | 4             | 4             | 4             | 4             | 4             | 4             | 4             | 4             | 4            |
| $\chi^2$                           | 0.8           | 1.3           | 0.8           | 0.9           | 0.8           | 0.9           | 1.0           | 0.9           | 0.9          |
| wRp                                | 5.8           | 4.9           | 5.9           | 6.2           | 6.3           | 6.9           | 6.6           | 6.8           | 6.4          |
| Rp                                 | 6.6           | 5.5           | 6.9           | 7.1           | 6.9           | 7.8           | 7.2           | 7.3           | 7.2          |

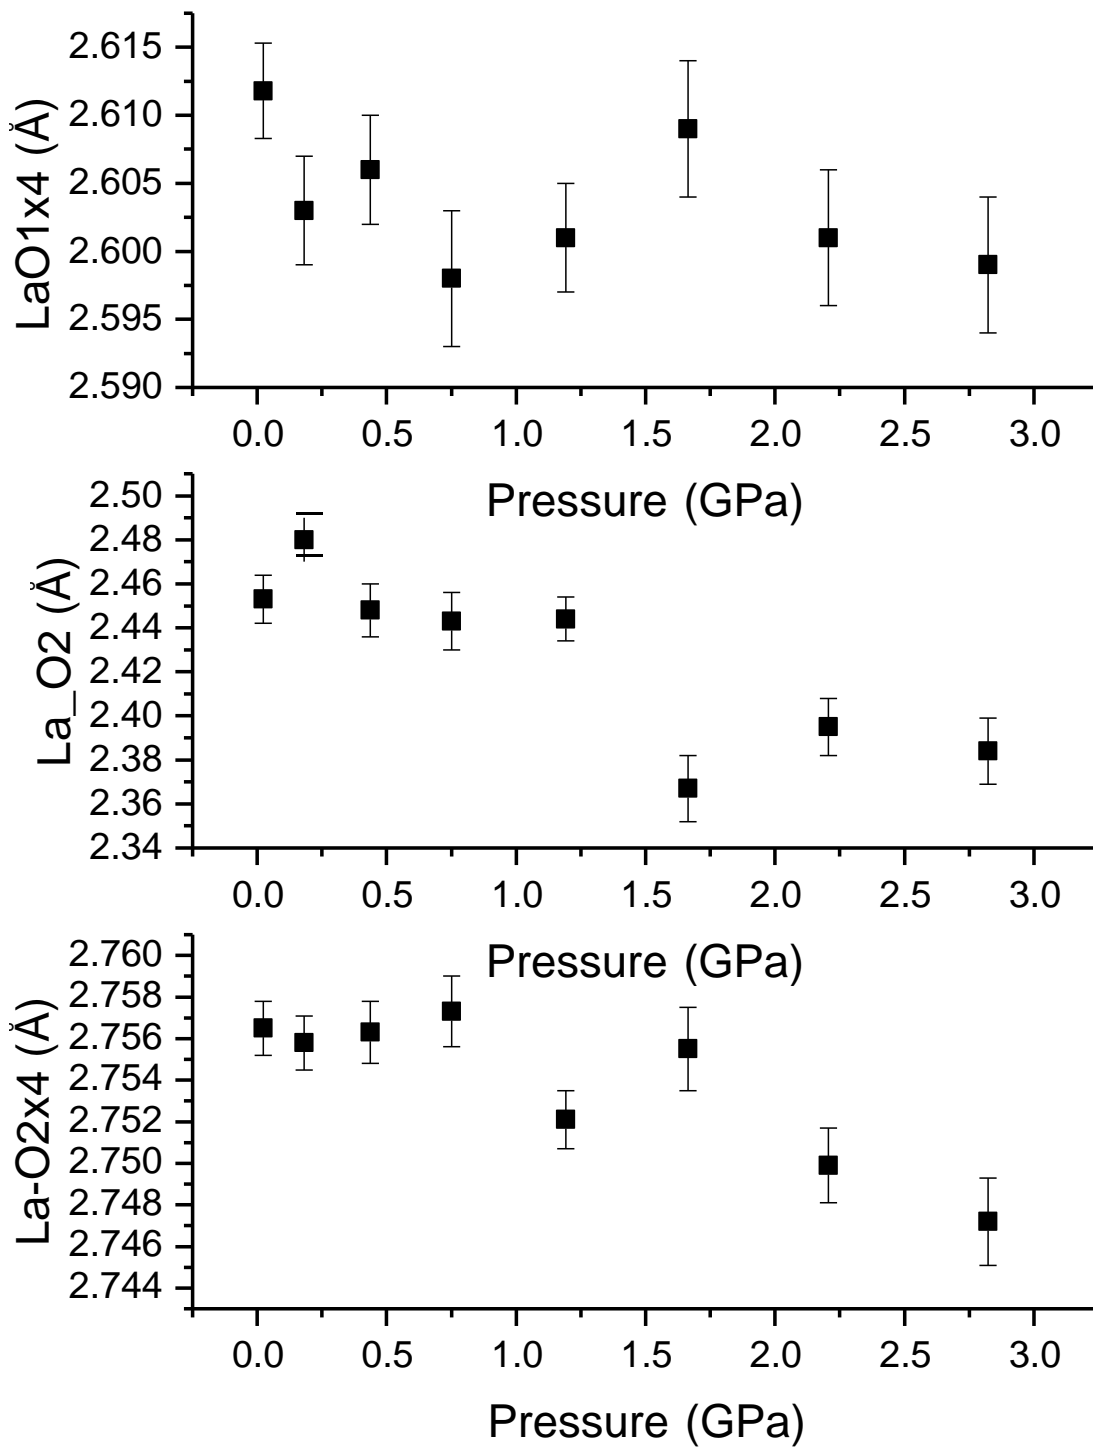

Figure S1: Variation in La-O bond distances with pressure of  $\text{La}_2\text{NiO}_{4+\delta}$ .

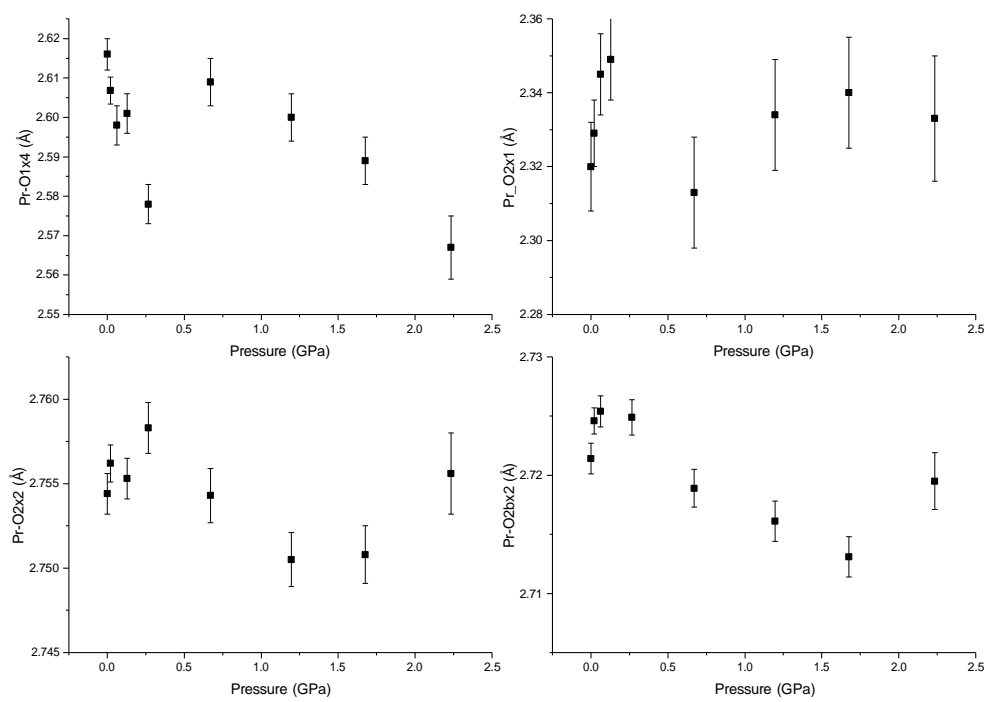

Figure S2: Variation in Pr–O bond distances with pressure of  $\text{Pr}_2\text{NiO}_{4+\delta}$ .

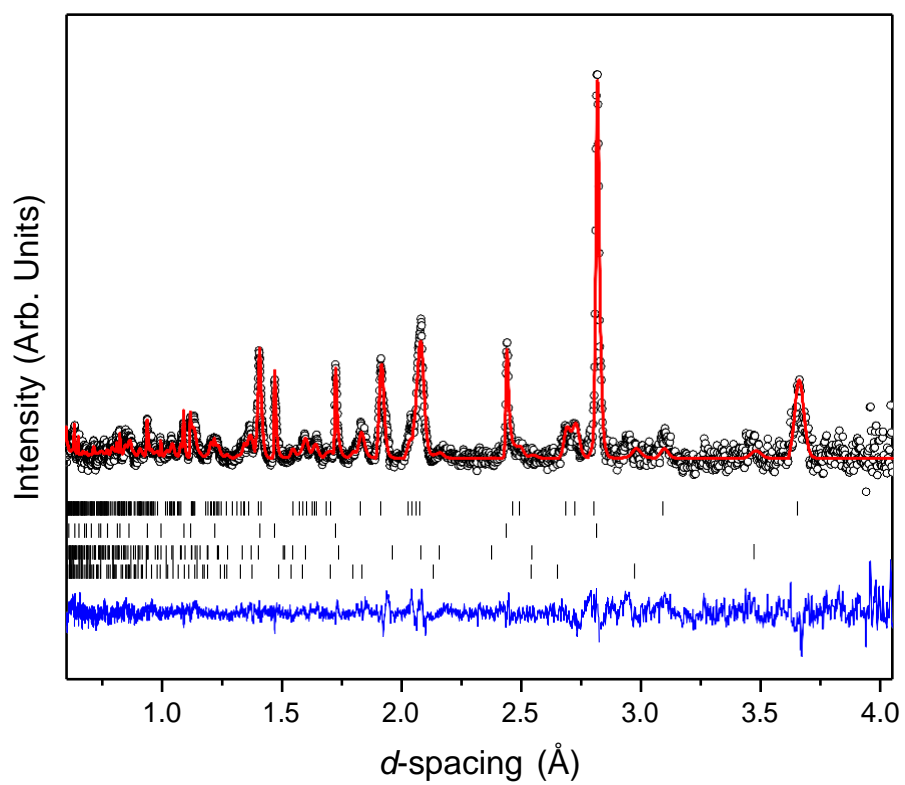

Figure S3: Diffraction pattern of  $\text{Pr}_2\text{NiO}_{4+\delta}$  at 2.2 GPa.
